# Supplementary material for: Strong contribution ofin situgrown nanowires to enhance the thermostabilities and microwave absorption properties of porous graphene foams under different atmospheres
Source: Royal Society of Chemistry journal article supplement (doi:10.1039/c7tc04102k), 2017-01-01
Supplement: c7tc04102k1.pdf [file c7tc04102k1.pdf]

## Supporting information

### **Strong contribution of in-situ grown nanowires to enhance thermostabilities and microwave absorption properties of porous graphene foams under different atmosphere**

**Shun Dong<sup>1</sup>, Juntao Song<sup>1</sup>, Xinghong Zhang<sup>1,\*</sup>, Ping Hu<sup>1,\*</sup>, Boqian Sun<sup>1</sup>,  
Shitong Zhou<sup>1</sup>, Xiaoguang Luo<sup>2</sup>**

<sup>1</sup>Science and Technology on Advanced Composites in Special Environment Laboratory, Harbin Institute of Technology, Harbin 150001, PR China

<sup>2</sup>The Institute of Theoretical and Applied Aerodynamics, China Academy of Aerospace Aerodynamics, Beijing 100074, PR China

\*E-mail: zhangxh@hit.edu.cn (Xinghong Zhang); Hupinghit88@163.com (Ping Hu).

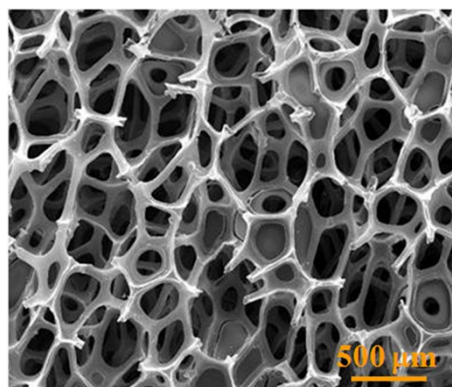

**Fig.S1** SEM image of as-prepared pristine porous GF.

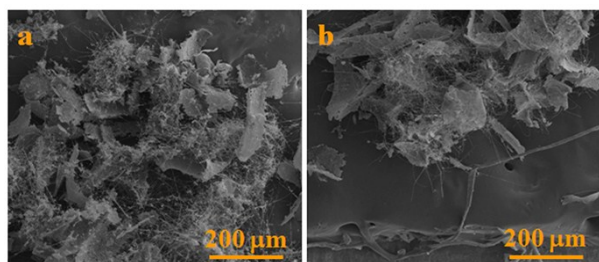

**Fig. S2** Typical SEM figures of S-Ar and S-N<sub>2</sub> under lower magnification.

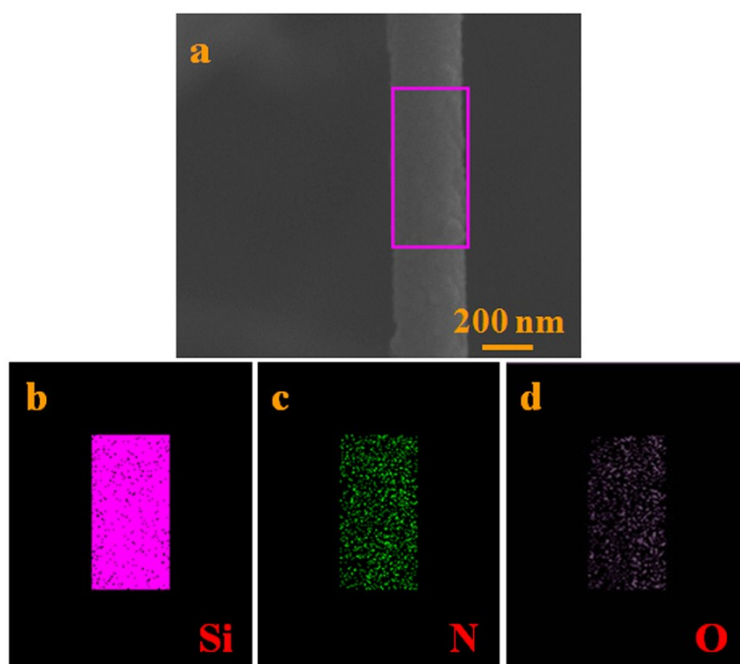

**Fig. S3** The elemental area scanning of  $\text{Si}_3\text{N}_4$  NW.

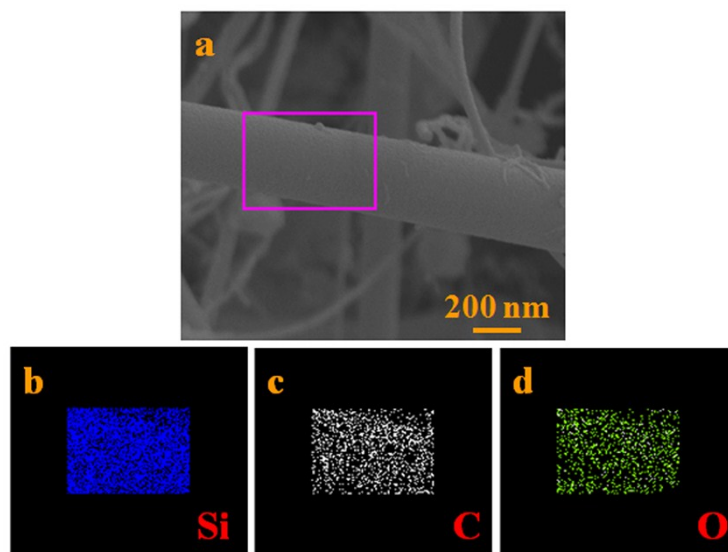

**Fig. S4** The elemental area scanning of SiC NW.

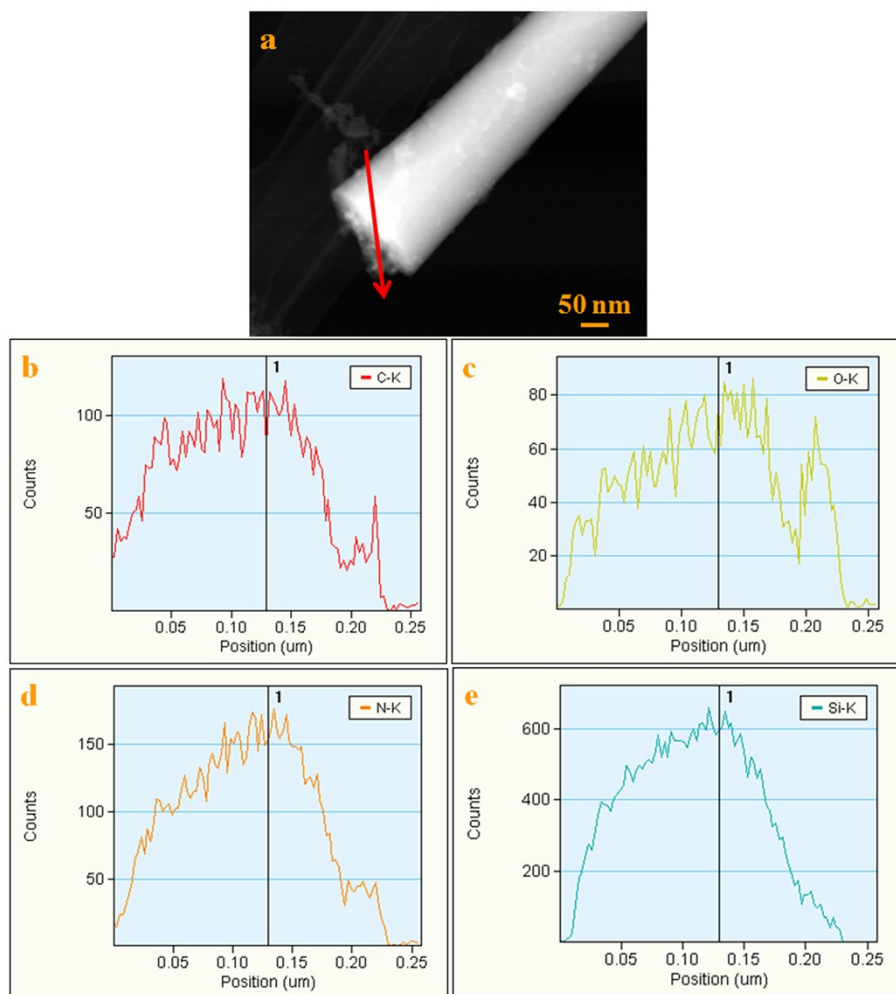

**Fig. S5** (a) HADF Scanning TEM image, and EDS line-scan for (b) C, (c) O, (d) N and (e) Si along the red line.

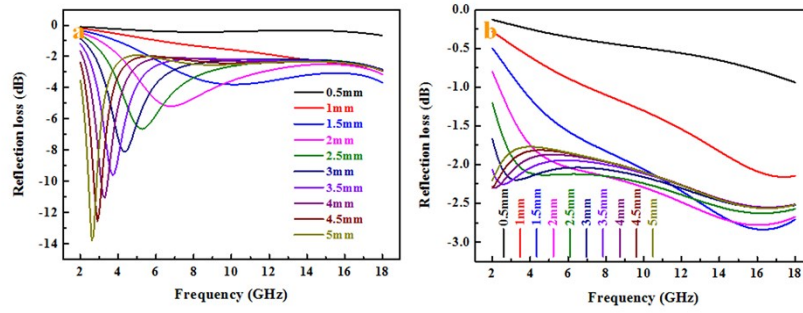

**Fig. S6** EM wave reflection losses of as-prepared pure GFs annealed at 1400 °C under N<sub>2</sub> and Ar in the frequency range of 2–18 GHz, respectively.

**Table S1** Comparison of EM wave absorption performance of different EM absorbers in recent literatures.

| Absorber                                          | Matrix   | Minimum RL (dB) | Optimum thickness (mm) | Maximum EAB (GHz) | Literature |
|---------------------------------------------------|----------|-----------------|------------------------|-------------------|------------|
| GF                                                | -        | -27             | 10                     | >4.2              | 1          |
| CF                                                | Paraffin | -5.58           | 3.0                    | 5.4               | 2          |
| SiC <sub>nws</sub>                                | Paraffin | -31.7           | 4.6                    | 3.7               | 3          |
| SiC <sub>nws</sub> -rGO                           | PDMS     | -40.7           | 3                      | >4.2              | 4          |
| SiC <sub>nws</sub> -CF                            | Epoxy    | -49.1           | 3.3                    | >4.2              | 5          |
| SiC <sub>nws</sub> -Cf                            | Silicone | -21.5           | 2.0                    | 2.5               | 6          |
| PANI nanorods-rGO                                 | PANI     | -52.5           | 2                      | ~4                | 7          |
| ZnO <sub>nws</sub> -rGO                           | PDMS     | -31.1           | 4.8                    | >4.2              | 8          |
| GF (1400-N <sub>2</sub> )                         | Paraffin | -13.8           | 5                      | 0.3               | This work  |
| GF (1400-Ar)                                      | Paraffin | -2.87           | 1.5                    | -                 | This work  |
| Si <sub>3</sub> N <sub>4</sub> <sub>nws</sub> -GF | Paraffin | -48.8           | 2.36                   | 1.8               | This work  |
| SiC <sub>nws</sub> -GF                            | Paraffin | -67.8           | 2.6                    | 5.4               | This work  |



## REFERENCES

- 1 Y. Zhang, Y. Huang, H. Chen, Z. Huang, Y. Yang, P. Xiao, Y. Chen, *Carbon*, 2016, **105**, 438-447.
- 2 L. Yan, C. Hong, B. Sun, G. Zhao, Y. Cheng, S. Dong, X. Zhang, *ACS Appl. Mater. Interfaces*, 2017, **9**, 6320-6331.
- 3 H. Zhang, Y. Xu, J. Zhou, J. Jiao, Y. Chen, H. Wang, Z. Wang, *J. Mater. Chem. C*, 2015, **3**, 4416-4423.
- 4 M. Han, X. Yin, Z. Hou, C. Song, X. Li, L. Zhang, L. Cheng, *ACS Appl. Mater. Interfaces*, 2017, **9**, 11803-11810.
- 5 S. Xiao, H. Mei, D. Han, K. G. Dassios, L. Cheng, *Carbon*, 2017, **122**, 718-725.
- 6 R. B. Wu, Z. H. Yang, M. S. Fu, K. Zhou, *J. Alloys Compd.*, 2016, **687**, 833-838.
- 7 Y. Wang, X. Wu, W. Zhang, *Mater. Lett.*, 2016, **165**, 71-74.
- 8 C. Song, X. Yin, M. Han, X. Li, Z. Hou, L. Zhang, L. Cheng, *Carbon*, 2017, **116**, 50-58.
